# Supplementary material
Source: ML conference proceedings conference paper supplement (https://openreview.net/forum?id=sbWVtxq8-zE)
Supplement: supplementary_material [file attachment]

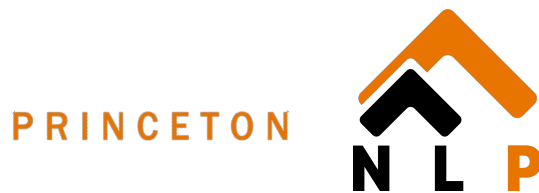

# Factual Probing is [MASK]: Learning vs. Learning to Recall

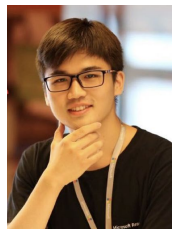

Zexuan Zhong\*

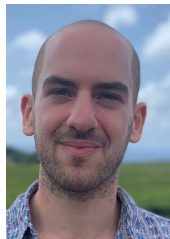

Dan Friedman\*

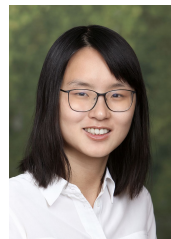

Danqi Chen

Princeton University

# Language Models Capture Factual Knowledge

# Language Models Capture Factual Knowledge

Fact: (DirectX, developer, Microsoft)

# Language Models Capture Factual Knowledge

Fact: (DirectX, developer, Microsoft)

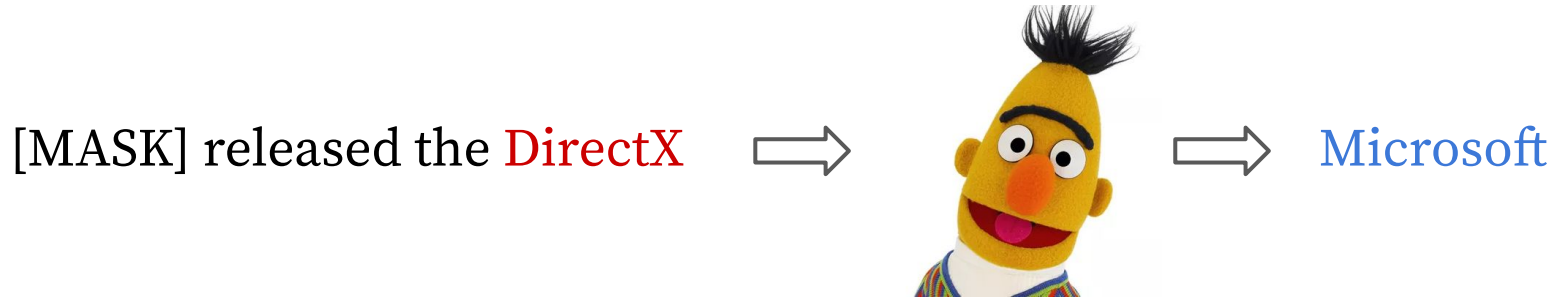

# This Work

1. How to **generate** good prompts for factual probing?
2. Can we **trust** the probing results of optimized prompts?
3. How can we better **interpret** the probing results?

# This Work

1. How to **generate** good prompts for factual probing?
2. Can we **trust** the probing results of optimized prompts?
3. How can we better **interpret** the probing results?

# Prompts Matter!

[MASK] released the DirectX

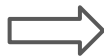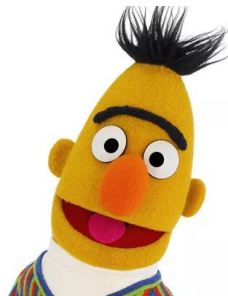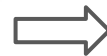

Microsoft

# Prompts Matter!

[MASK] released the **DirectX** ⇒  ⇒ **Microsoft**

**DirectX** was developed by [MASK] ⇒  ⇒ **Intel**



# Prompts Matter!

[MASK] released the DirectX

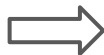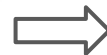

Microsoft

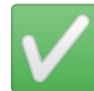

DirectX was developed by [MASK]

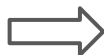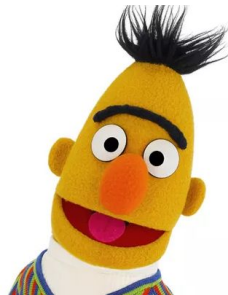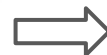

Intel

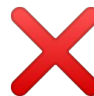

# Generating Prompts

# Generating Prompts

**LAMA** (Petroni et al., 2019):

manually defined

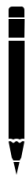

[X] is [MASK] citizen

# Generating Prompts

**LAMA** (Petroni et al., 2019):  
manually defined

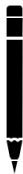

[X] is [MASK] citizen

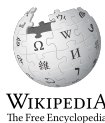

**LPAQA** (Jiang et al., 2020):  
mined & paraphrased

[X] is a citizen of [MASK]

# Generating Prompts

**LAMA** (Petroni et al., 2019):  
manually defined

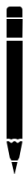

[X] is [MASK] citizen

**LPAQA** (Jiang et al., 2020):  
mined & paraphrased



[X] is a citizen of [MASK]

**AutoPrompt** (Shin et al., 2020):  
discrete-token search

[X] m<sup>3</sup> badminton pieces internationally representing [MASK]

# Generating Prompts

**LAMA** (Petroni et al., 2019):  
manually defined



[X] is [MASK] citizen



**LPAQA** (Jiang et al., 2020):  
mined & paraphrased

[X] is a citizen of [MASK]

**AutoPrompt** (Shin et al., 2020):  
discrete-token search

[X] m<sup>3</sup> badminton pieces internationally representing [MASK]

*Why do prompts have to be a sequence of **tokens**?*

# Generating Prompts

**LAMA** (Petroni et al., 2019):  
manually defined



[X] is [MASK] citizen



**LPAQA** (Jiang et al., 2020):  
mined & paraphrased

[X] is a citizen of [MASK]

**AutoPrompt** (Shin et al., 2020):  
discrete-token search

[X] m<sup>3</sup> badminton pieces internationally representing [MASK]

**OptiPrompt (ours):**  
dense-vector optimization

[X]     [MASK]

# OptiPrompt

## Prompt definition

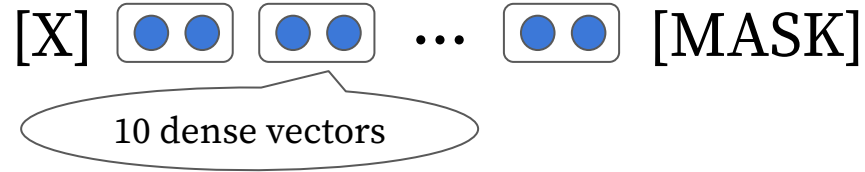



# OptiPrompt

Prompt definition

[X]   ...  [MASK]

-----

[X]    is    [MASK]    citizen

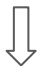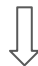

[X]  [MASK] 

# OptiPrompt

Prompt definition

[X]   ...  [MASK]

Training

$$\mathcal{L}_r = -\frac{1}{|D_r|} \sum_{(s,o) \in D_r} \log P([MASK] = o \mid t_r(s))$$

1,000  $(s, o)$  pairs for each relation  $r$

# Results on the LAMA Benchmark

Results are based on BERT-base

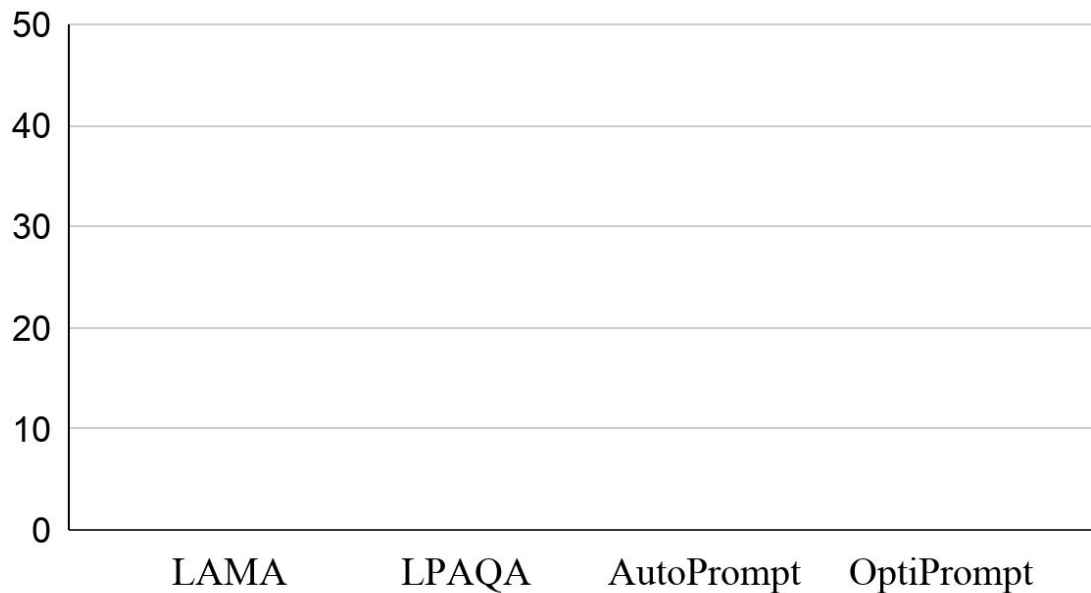

# Results on the LAMA Benchmark

Results are based on BERT-base

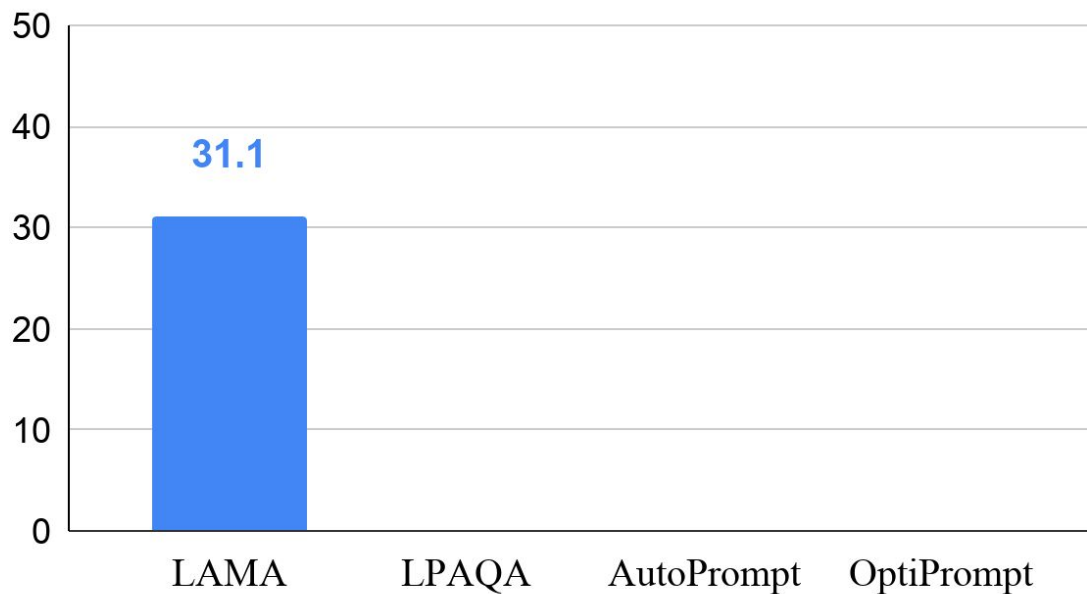

# Results on the LAMA Benchmark

Results are based on BERT-base

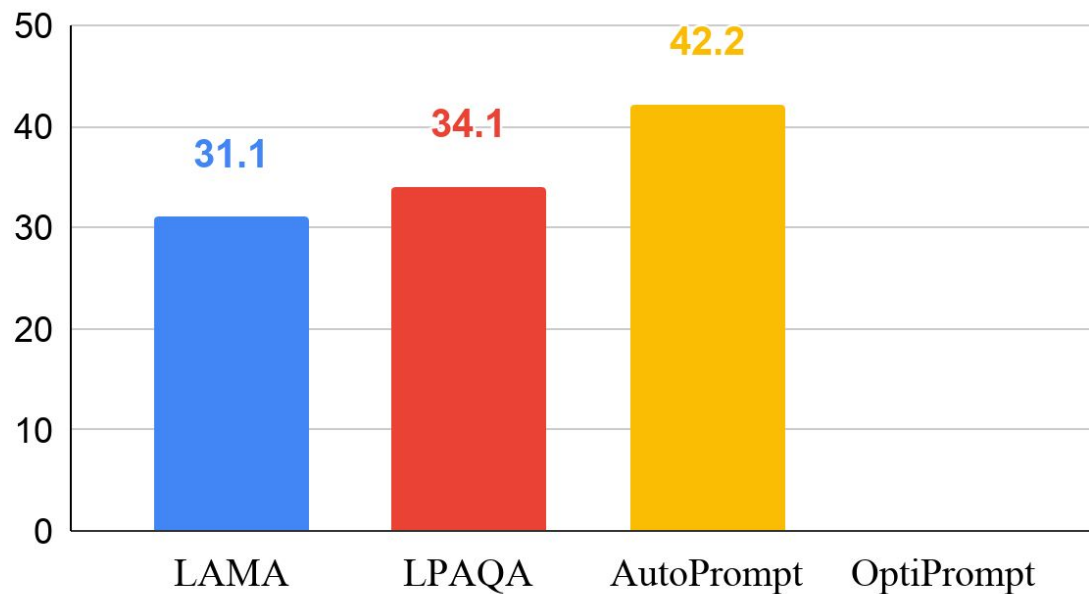

# Results on the LAMA Benchmark

Results are based on BERT-base

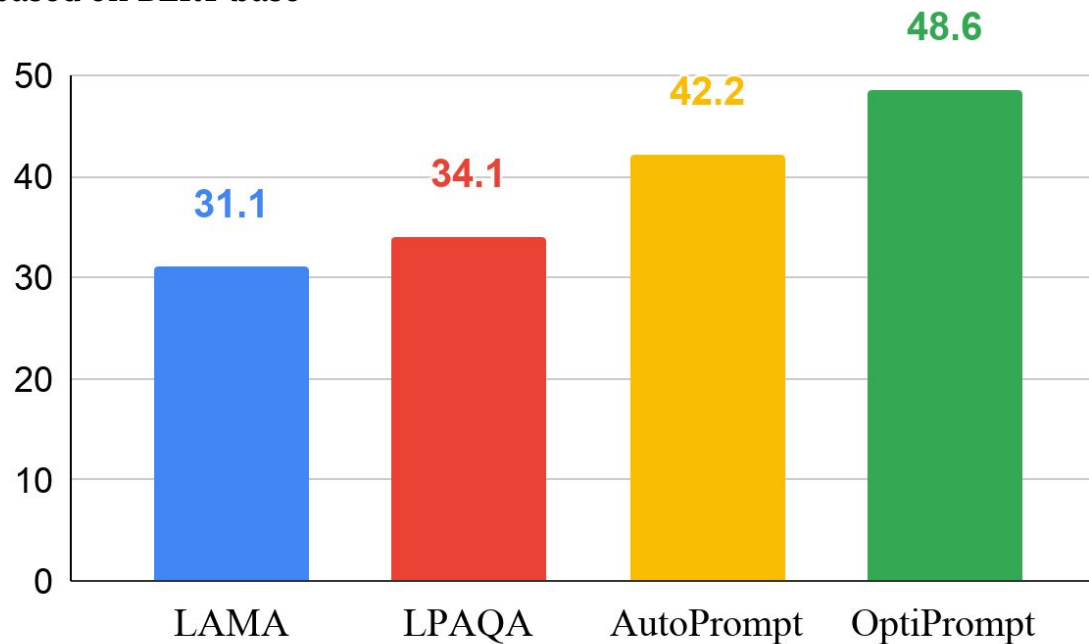

# Results on the LAMA Benchmark

Results are based on BERT-base

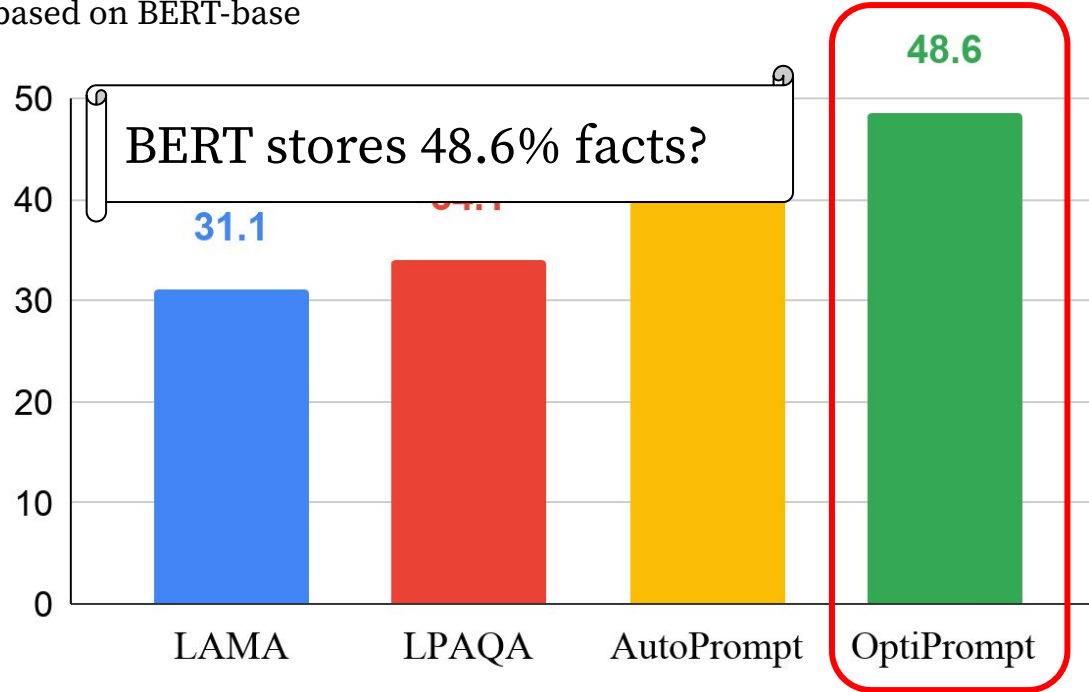

# Results on the LAMA Benchmark

Results are based on BERT-base

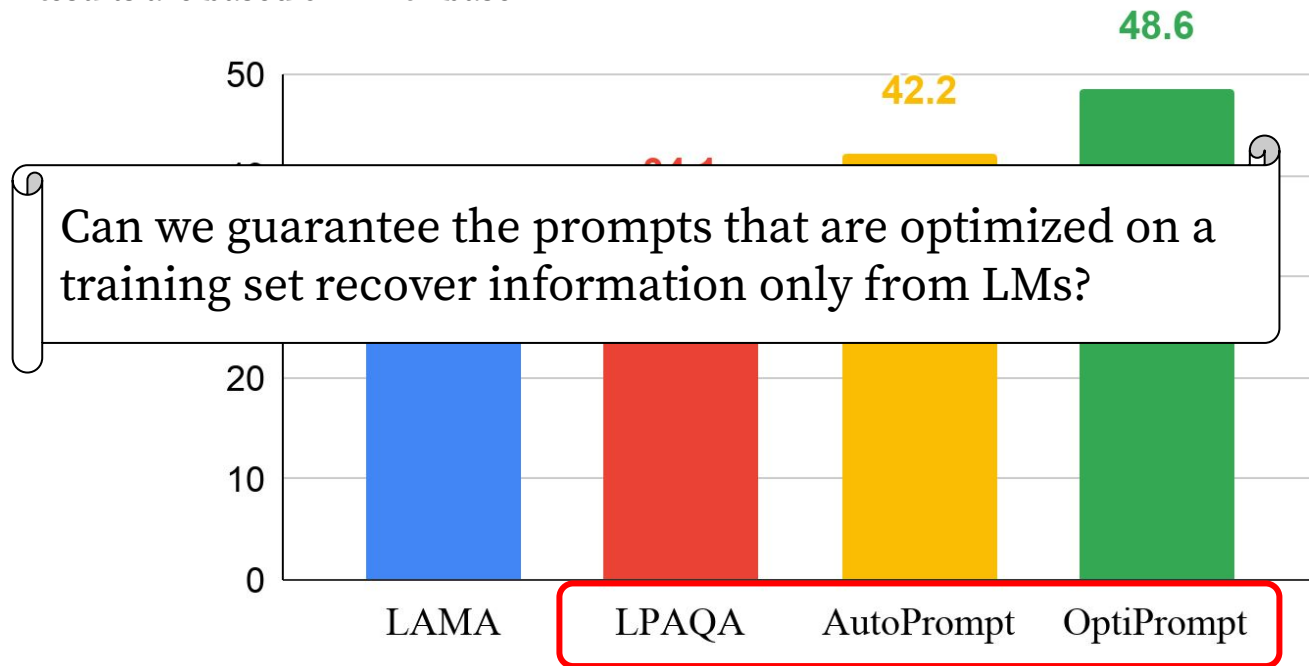

optimized on a training set



# This Work

1. How to **generate** good prompts for factual probing?
2. Can we **trust** the probing results of optimized prompts?
3. How can we better **interpret** the probing results?

# Analogy to Linguistic Probing

## Training

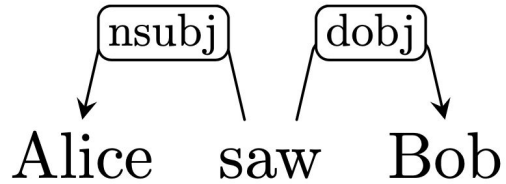

## Testing

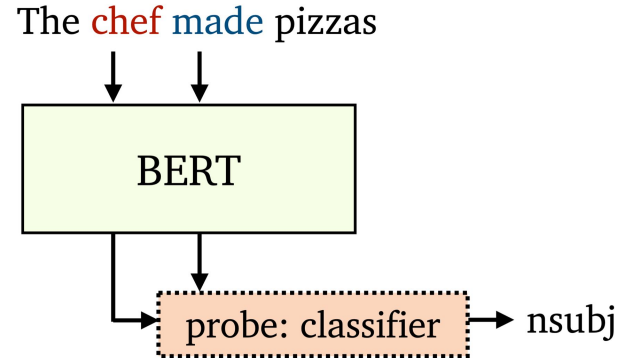

# Analogy to Linguistic Probing

## Training

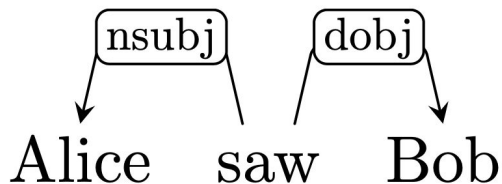

## Testing

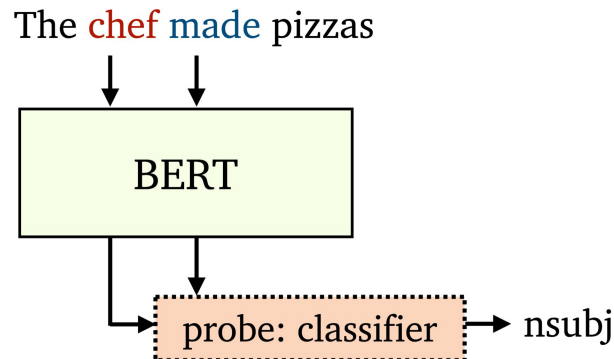

Disentangle the information **encoded in the representations** from the information **learned by the probe**.

## Training

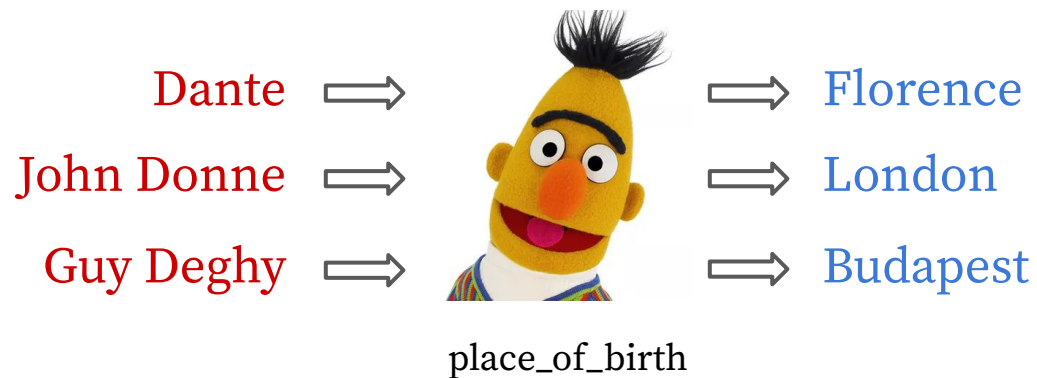

## Training

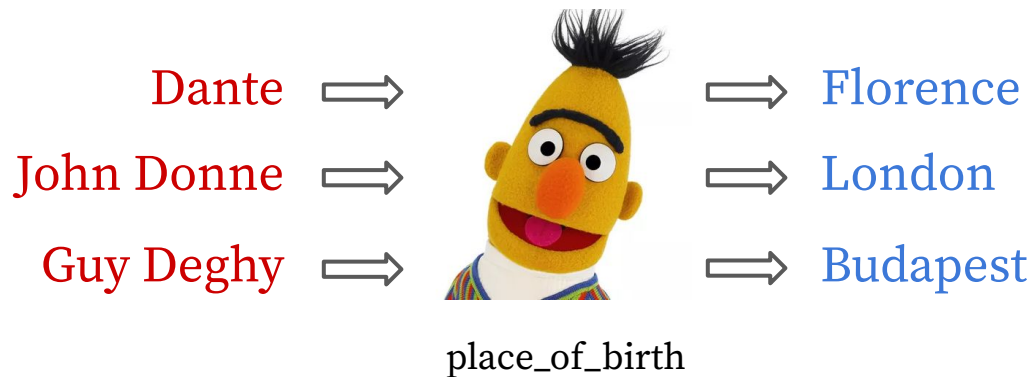

## Testing

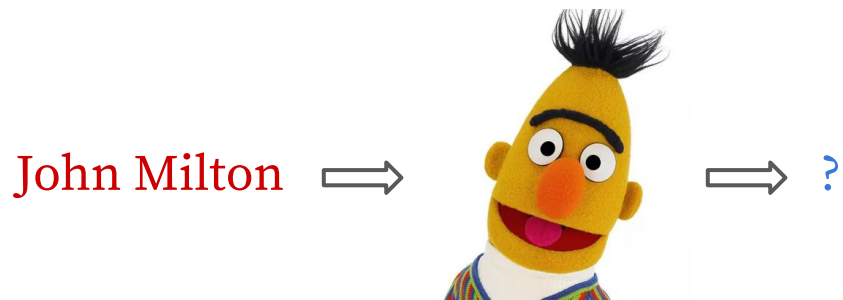

Are there 48.6% facts stored in the pre-trained BERT?

No!

Are there 48.6% facts stored in the pre-trained BERT?

No!

1. Unseen facts can be predicted from training data

Are there 48.6% facts stored in the pre-trained BERT?

No!

1. Unseen facts can be predicted from training data
2. Prompts can exploit training data



# Facts can be predicted from training data

## Majority model

- always predicts the **majority** class
- 17.3% accuracy in LAMA

# Facts can be predicted from training data

## Majority model

- always predicts the **majority** class
- 17.3% accuracy in LAMA

## Imbalanced distributions

- native\_language: **60%** French
- continent: **72%** Antarctica

# Facts can be predicted from training data

## Naive Bayes model

- simple **bag-of-words** classifier
- 24.6% accuracy in LAMA

# Facts can be predicted from training data

## Naive Bayes model

- simple **bag-of-words** classifier
- 24.6% accuracy in LAMA

## Correlations between subject tokens and object tokens

- *Chevrolet* manufactures the *Chevrolet Impala*
- *Ghana Football Association* is a member of *FIFA*

Prompts can exploit training data

# Prompts can exploit training data

## Random controls

- **Random Model:** optimize prompts on a random initialized model
- **Random Embeddings:** optimize prompts on a model with random embeddings

## Results of random controls

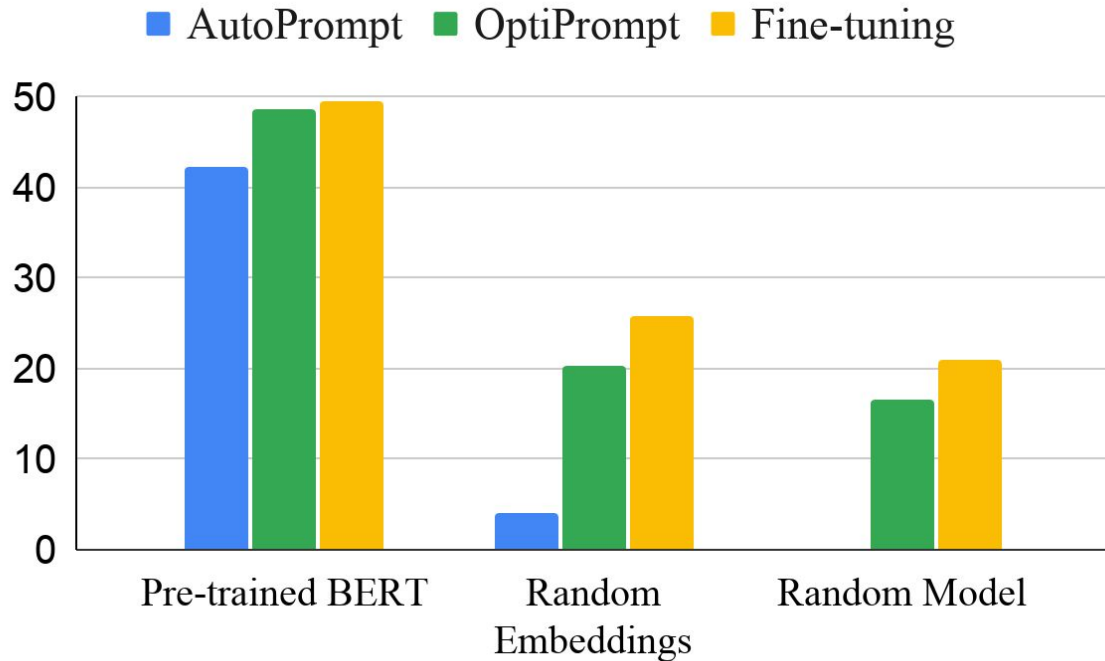

# Results of random controls

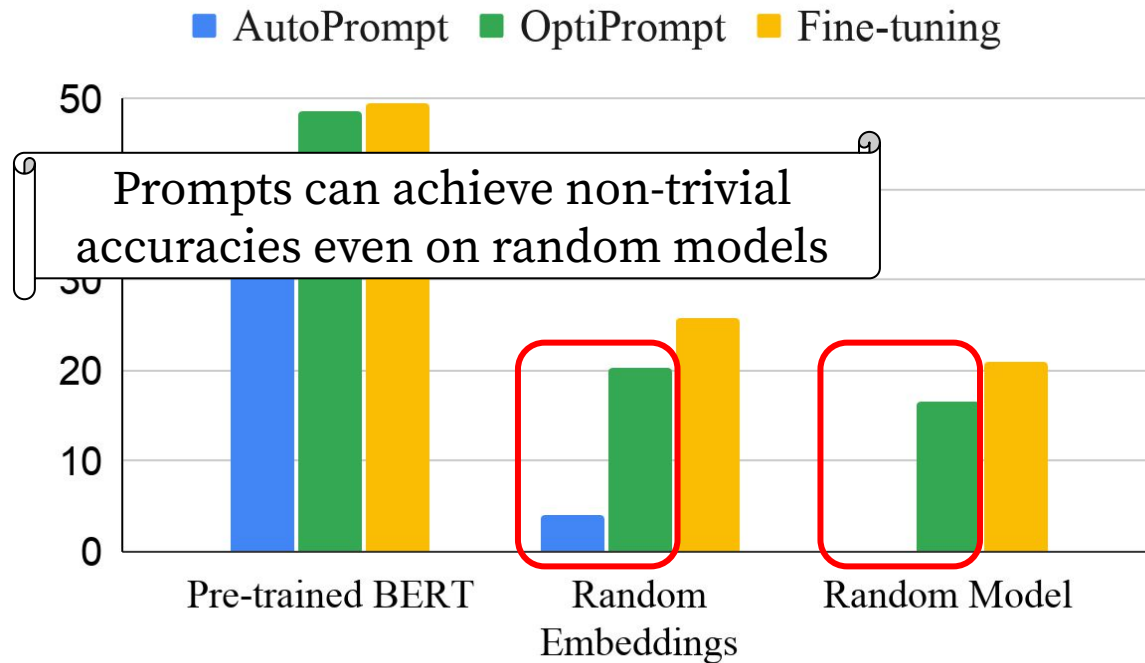



# Results of random controls

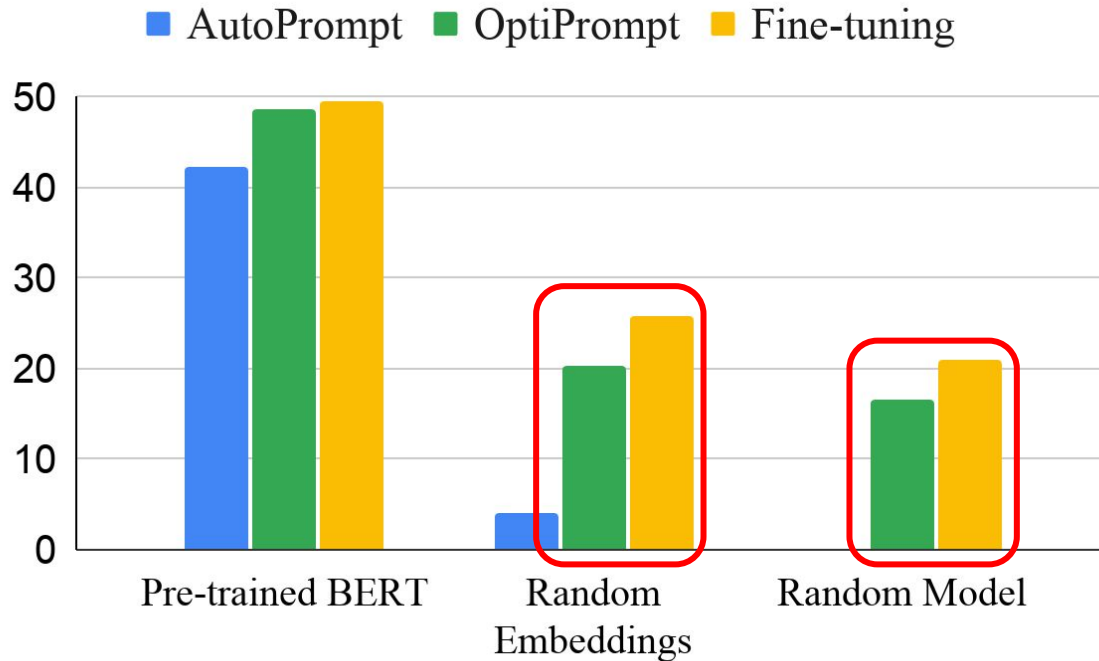

# Prompts can exploit training data

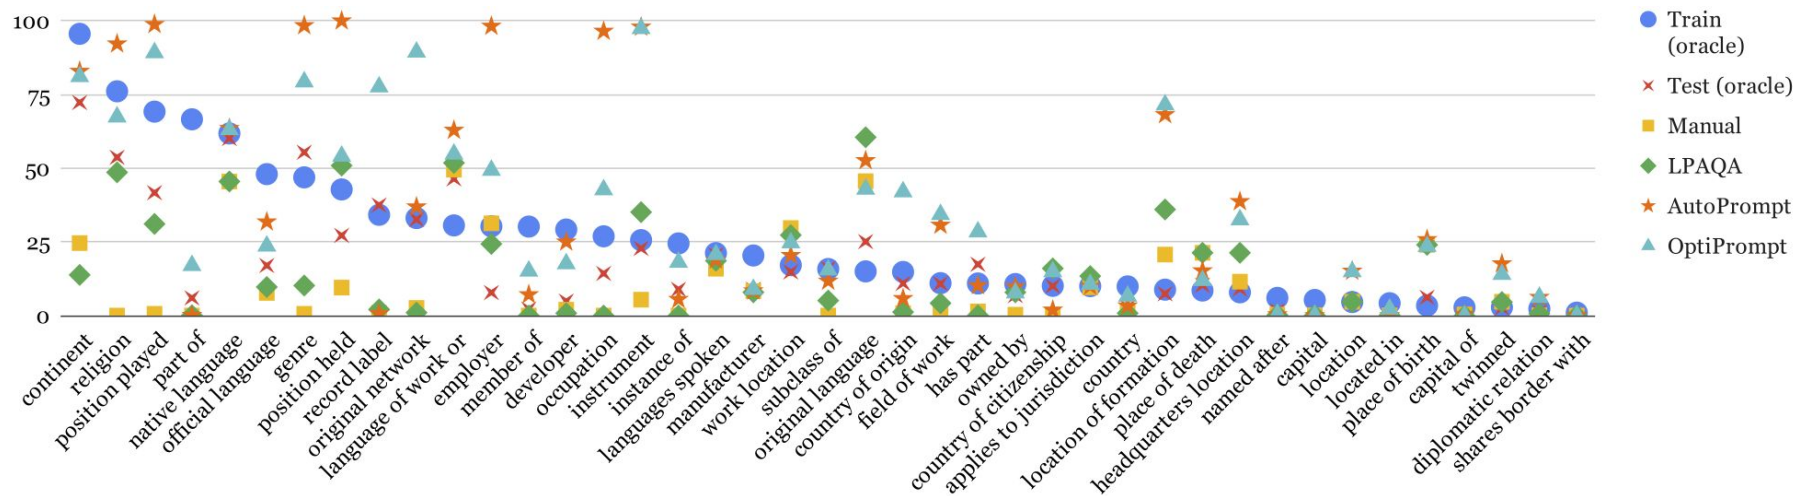

# Prompts can exploit training data

**Over-predicting the majority class**

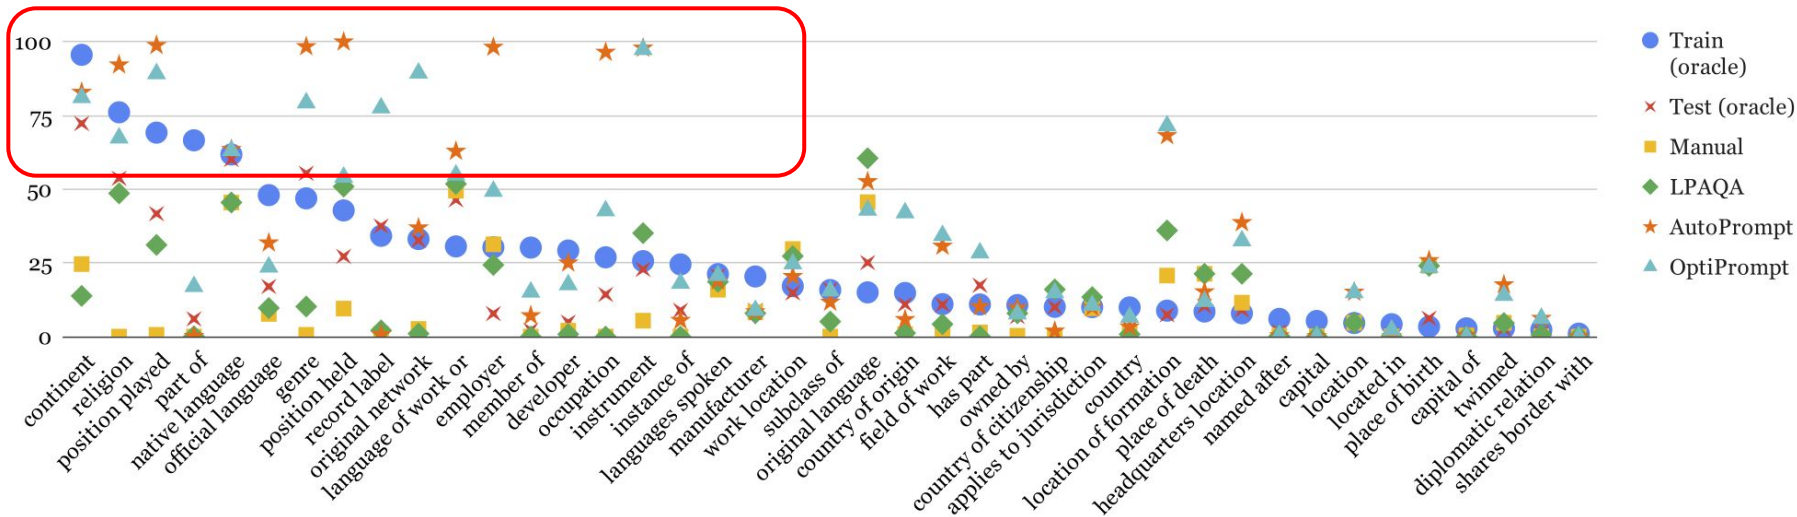

We cannot interpret the LAMA probing results of optimized prompts as a **lower bound** of the amount of knowledge in BERT.

# This Work

1. How to **generate** good prompts for factual probing?
2. Can we **trust** the probing results of optimized prompts?
3. How can we better **interpret** the probing results?

# Partition LAMA examples

## 1. LAMA-Easy

- Facts that can be predicted by the Naive Bayes model or by fine-tuning a random BERT on the training set

## 2. LAMA-Hard

- The remain facts

## Results on LAMA-Easy and LAMA-Hard

| Method     | All<br>(34,039) | Easy<br>(10,546) | Hard<br>(23,493) |
|------------|-----------------|------------------|------------------|
| Manual     | 31.1            | 41.5             | 24.3             |
| LPAQA      | 34.1            | 47.0             | 25.6             |
| AUTOPROMPT | 42.2            | 68.2             | 26.7             |
| OPTIPROMPT | <b>48.6</b>     | <b>75.6</b>      | <b>33.0</b>      |

## Results on LAMA-Easy and LAMA-Hard

| Method     | All<br>(34,039) | Easy<br>(10,546) | Hard<br>(23,493) |
|------------|-----------------|------------------|------------------|
| Manual     | 31.1            | 41.5             | 24.3             |
| LPAQA      | 34.1            | 47.0             | 25.6             |
| AUTOPROMPT | 42.2            | 68.2             | 26.7             |
| OPTIPROMPT | <b>48.6</b>     | <b>75.6</b>      | <b>33.0</b>      |



## Results on LAMA-Easy and LAMA-Hard

| Method     | All<br>(34,039) | Easy<br>(10,546) | Hard<br>(23,493) |
|------------|-----------------|------------------|------------------|
| Manual     | 31.1            | 41.5             | 24.3             |
| LPAQA      | 34.1            | 47.0             | 25.6             |
| AUTOPROMPT | 42.2            | 68.2             | 26.7             |
| OPTIPROMPT | <b>48.6</b>     | <b>75.6</b>      | <b>33.0</b>      |

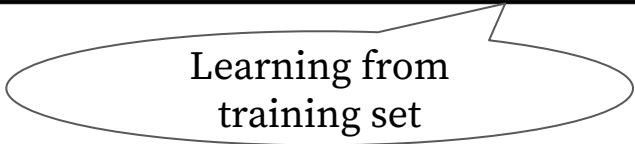

Learning from  
training set

# Results on LAMA-Easy and LAMA-Hard

Learning to recall facts

| Method     | All<br>(34,039) | Easy<br>(10,546) | Hard<br>(23,493) |
|------------|-----------------|------------------|------------------|
| Manual     | 31.1            | 41.5             | 24.3             |
| LPAQA      | 34.1            | 47.0             | 25.6             |
| AUTOPROMPT | 42.2            | 68.2             | 26.7             |
| OPTIPROMPT | <b>48.6</b>     | <b>75.6</b>      | <b>33.0</b>      |

Learning from  
training set

# Conclusions

1. **OptiPrompt**: a simple & effective approach to generate prompts
2. Optimized prompts can **exploit training data** to make correct predictions
  - Probing results cannot be directly interpreted as a lower bound of amount of knowledge stored in the LM
3. **Random controls** can help us better interpret the probing results

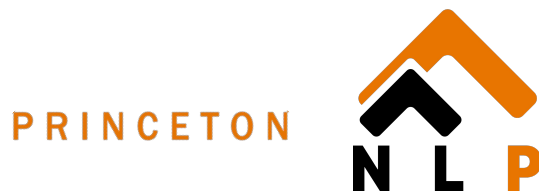

# Thank You!

Paper: <https://arxiv.org/pdf/2104.05240.pdf>

Code: <https://github.com/princeton-nlp/OptiPrompt>
